# Supplementary material
Source: MDPI journal article supplement (https://www.mdpi.com/2813-3463/3/2/7)
Supplement: s1 [file s1]

Archive with 1 entries (1 files):
- grasses-2653592-supplementary.pdf
