# Supplementary material
Source: MDPI journal article supplement (https://www.mdpi.com/2813-3463/3/2/7)
Supplement: s1 [file s1 › grasses-2653592-supplementary.pdf]

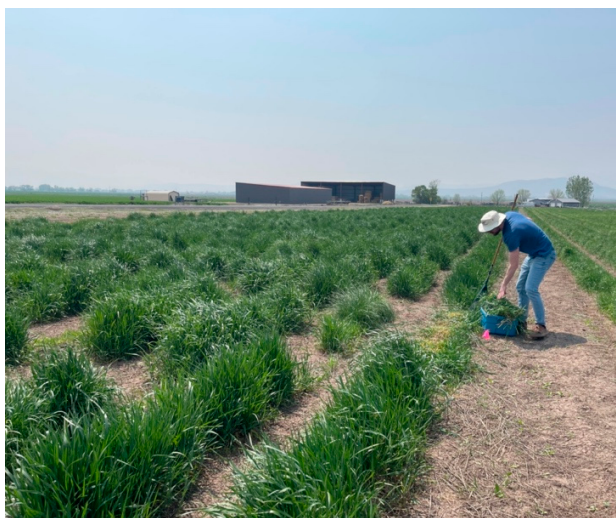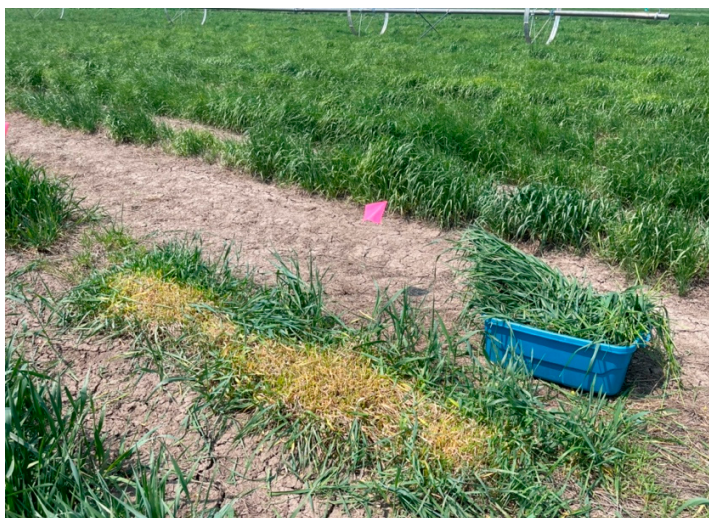

**Figure S1.** Forage harvest activities at the Richmond, UT site in 2023.

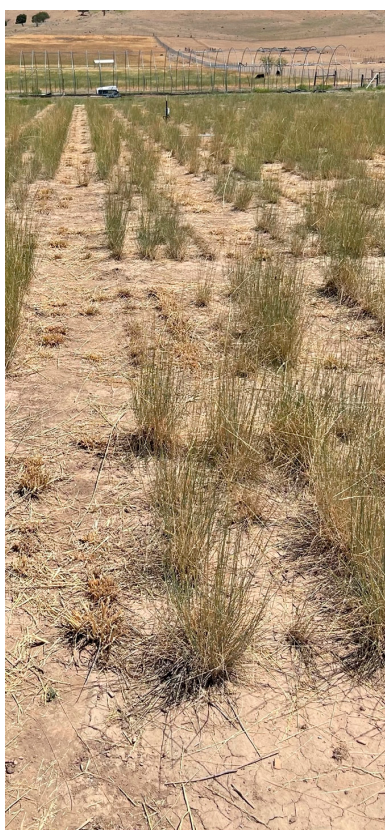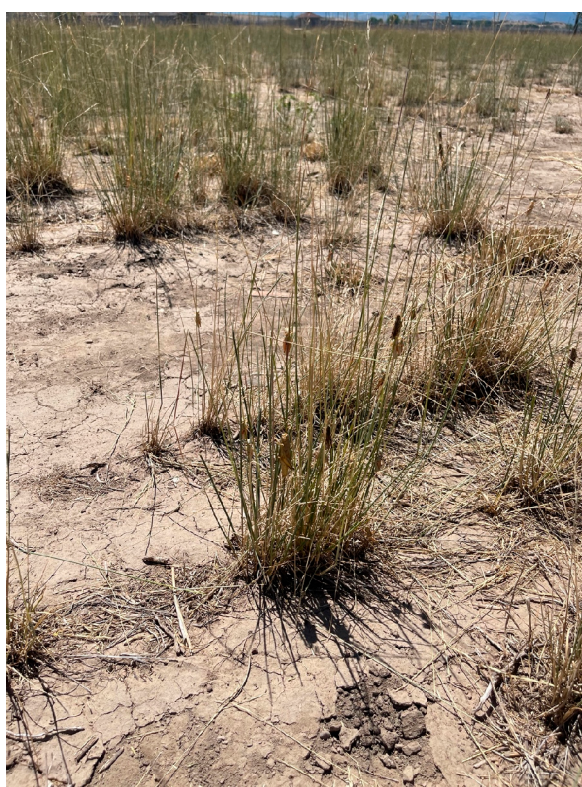

**Figure S2.** Examples of poor canopy conditions due to defoliation by grasshoppers at the Millville, UT site in 2023.

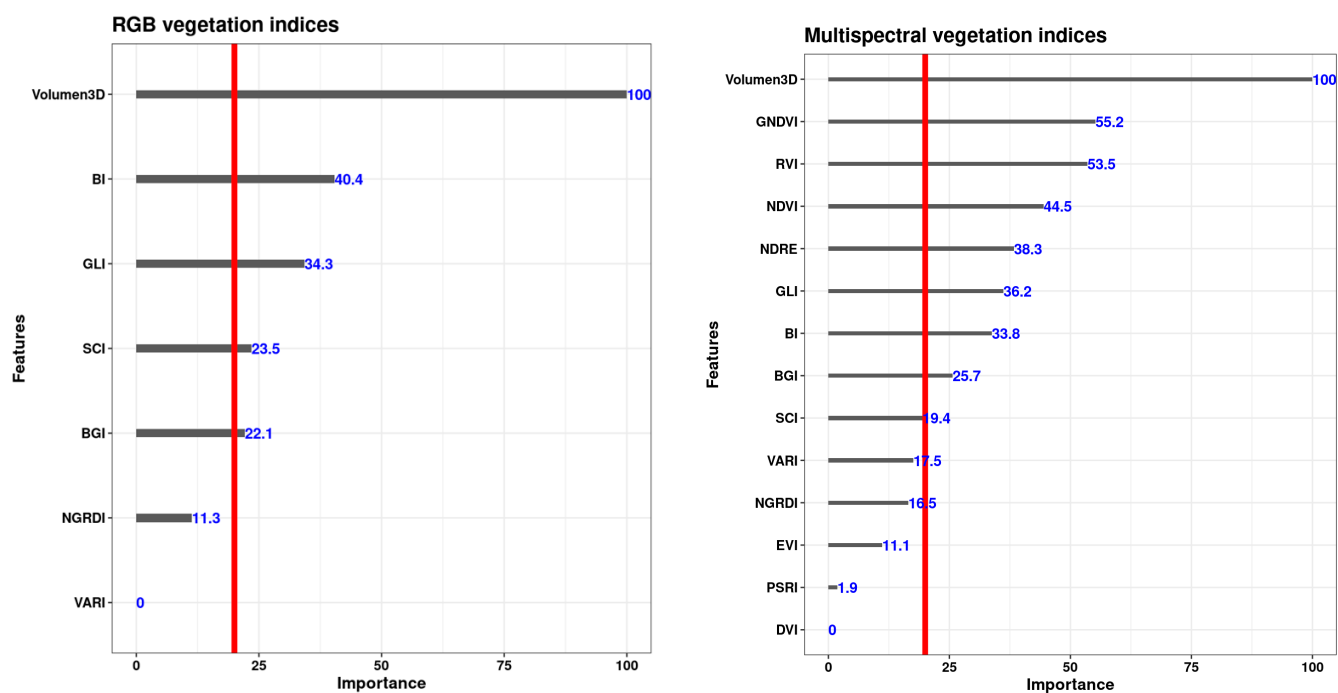

**Figure S3.** Variable importance plots for the RGB (left panel) and Multispectral (right panel) derivatives. Red line indicates the threshold (20%) that was arbitrarily used to choose predictors to include in the stratified cross validation models.

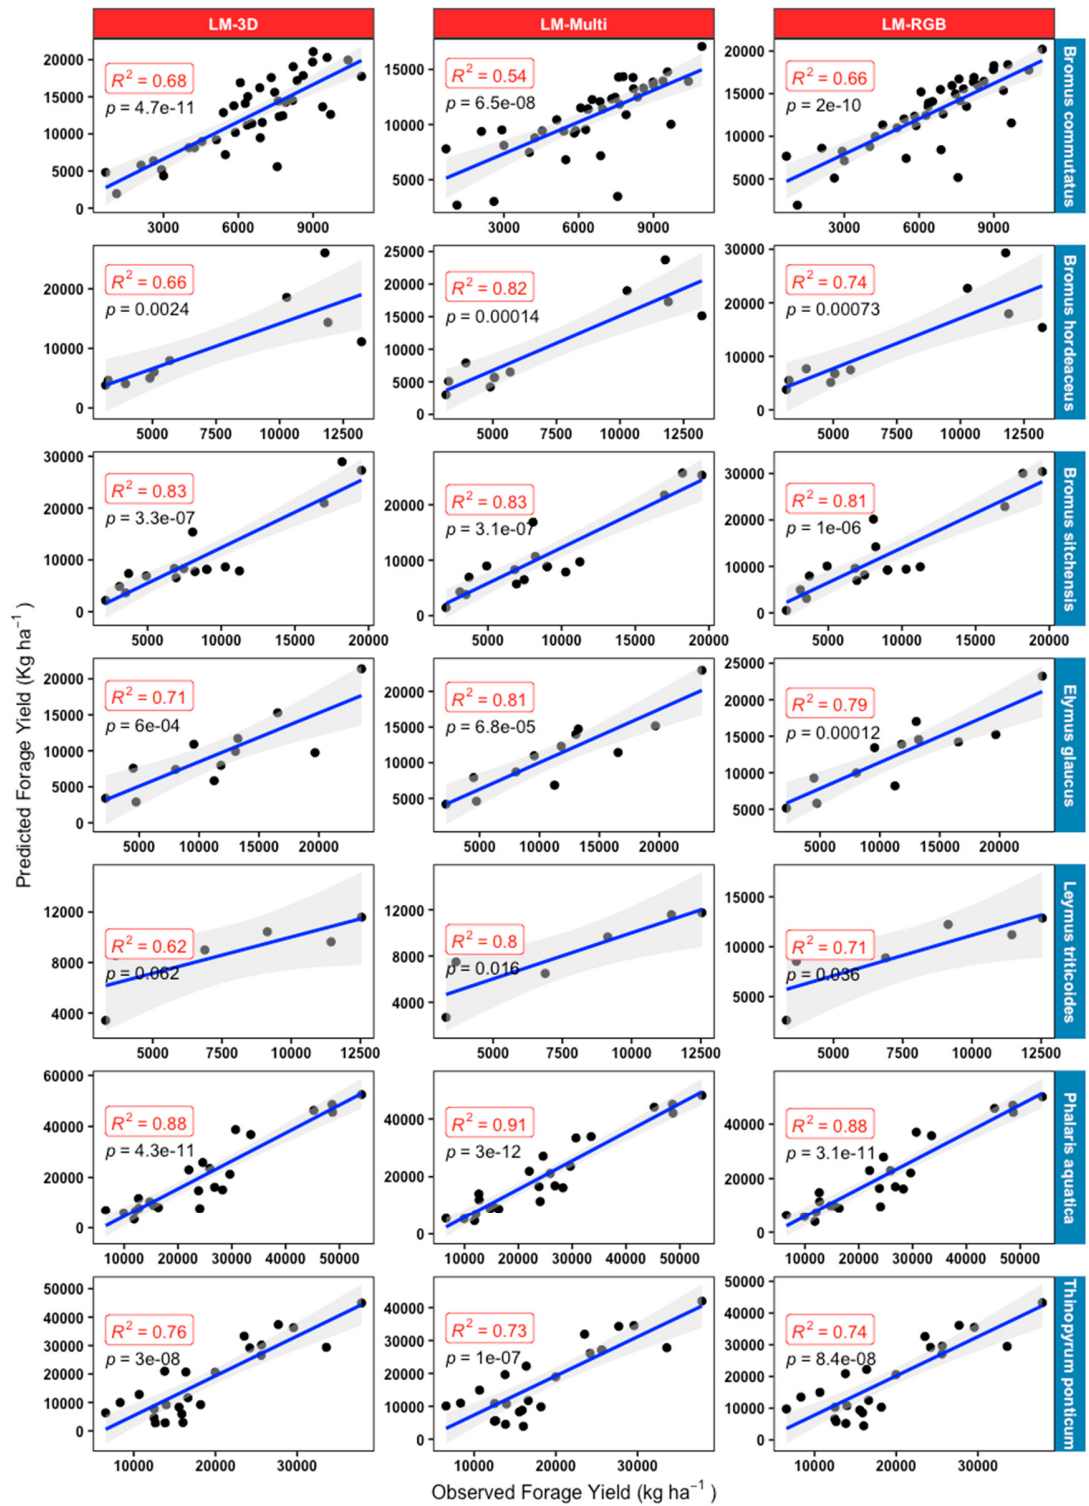

**Figure S4.** Linear models LM-3D, LM-RGB and LM-Multi scatterplots and adjusted  $R^2$  for the different model structures (red panels) using the grasses (blue rows) that were not included during model fit using cross validation.

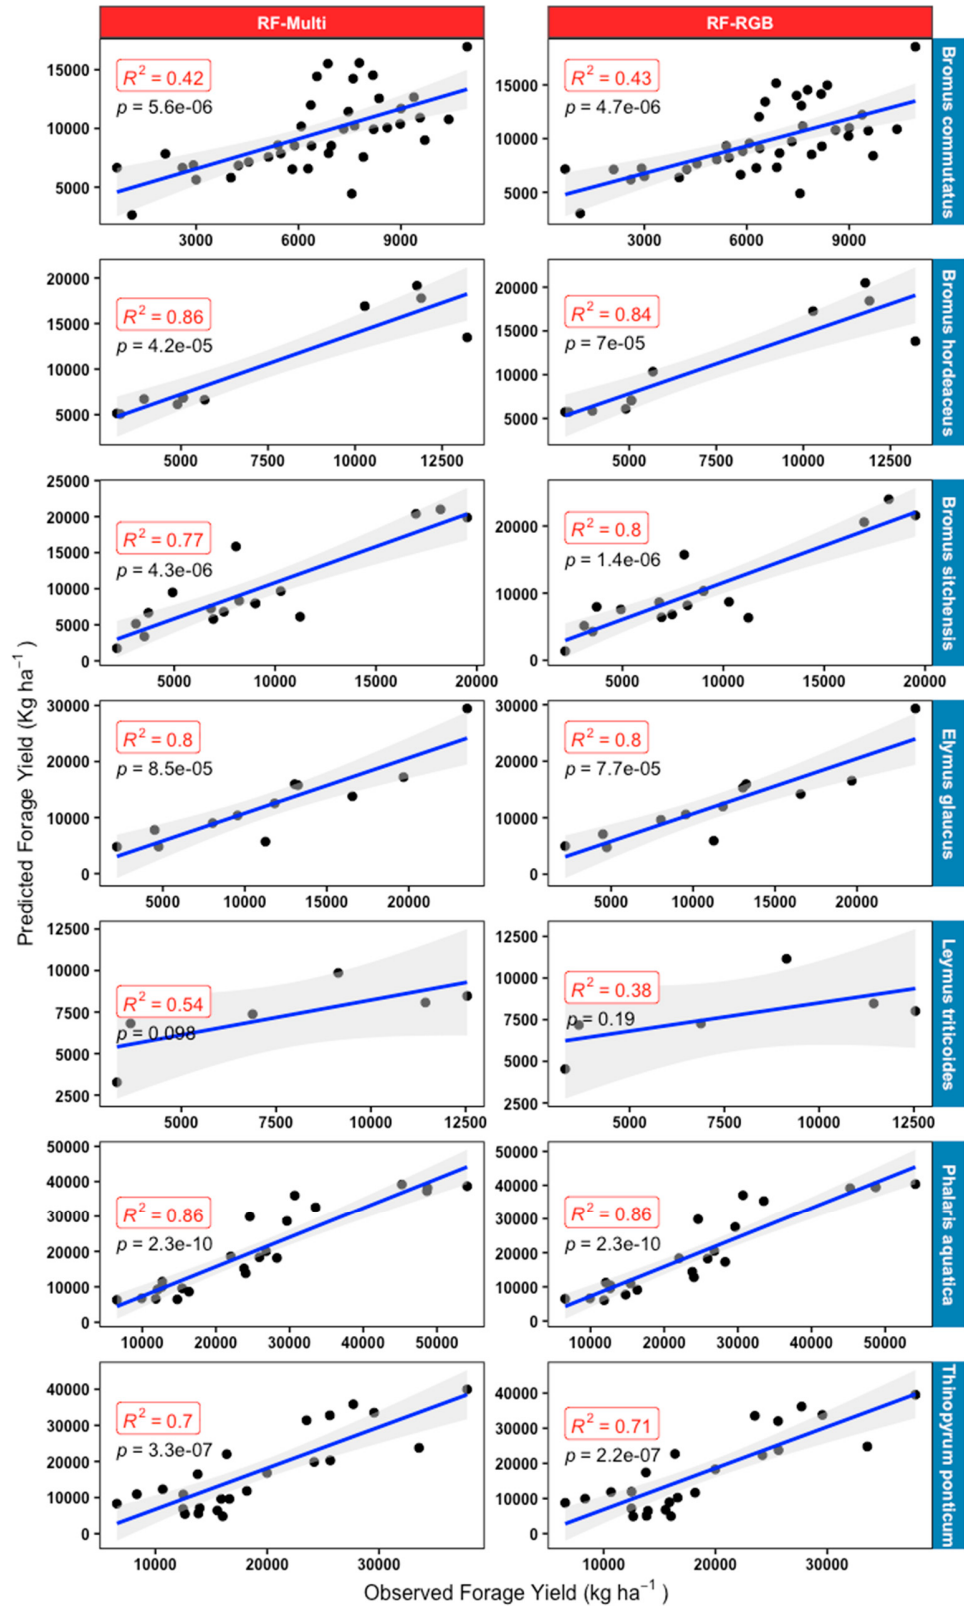

**Figure S5.** Random Forest RF models scatterplots and adjusted  $R^2$  for the different model structures (red panels) using the grasses (blue rows) that were not included during model fit using cross validation.

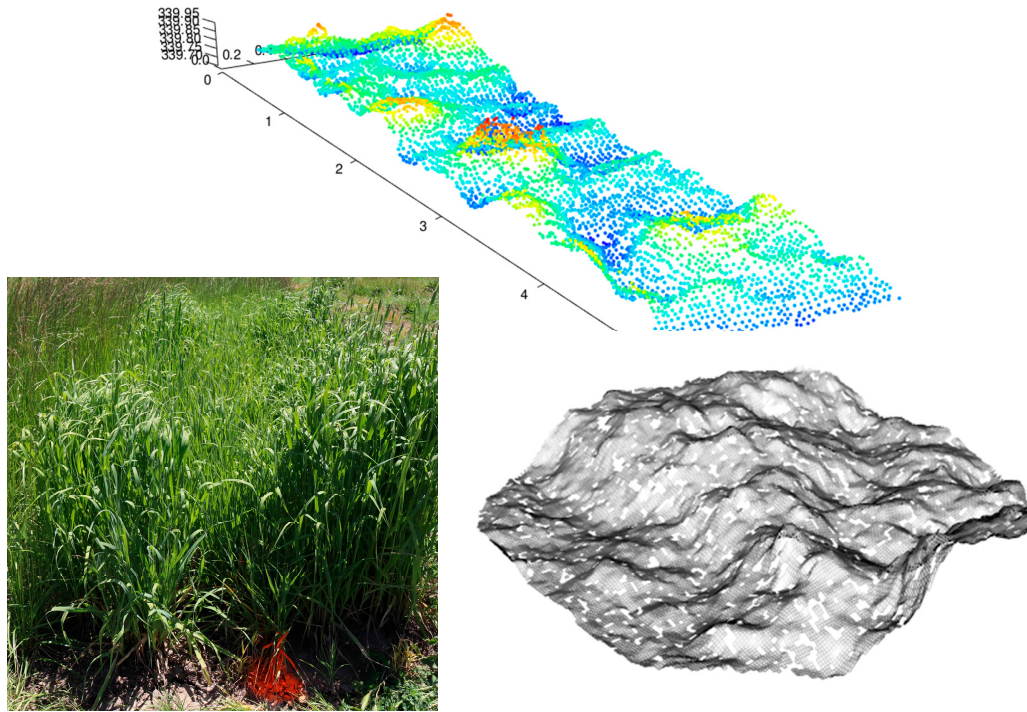

**Figure S6.** Schematic representation of the dense point cloud for a 5x1 m plot of a dense canopy grass *Phalaris aquatica* with a fraction of the derived digital surface model DSM. A picture taken prior to the first harvest is also included.

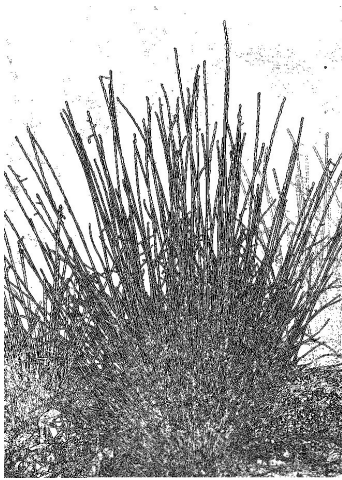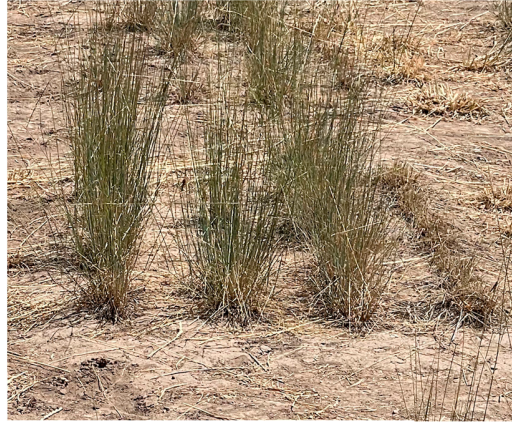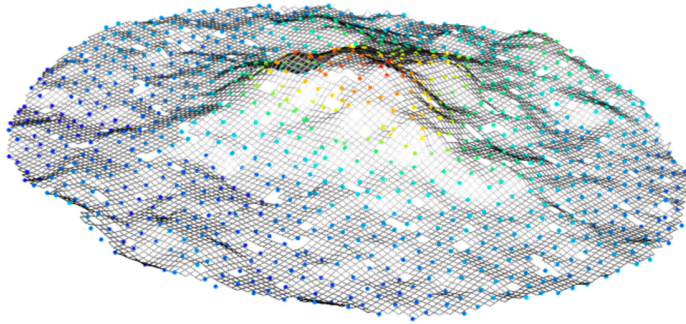

**Figure S7.** Schematic representation of a typical sparse canopy grass *Pseudoroegneria spicata* that shows the multiple empty spaces that cannot be depicted in the dense point cloud and thus in the corresponding digital surface model DSM.

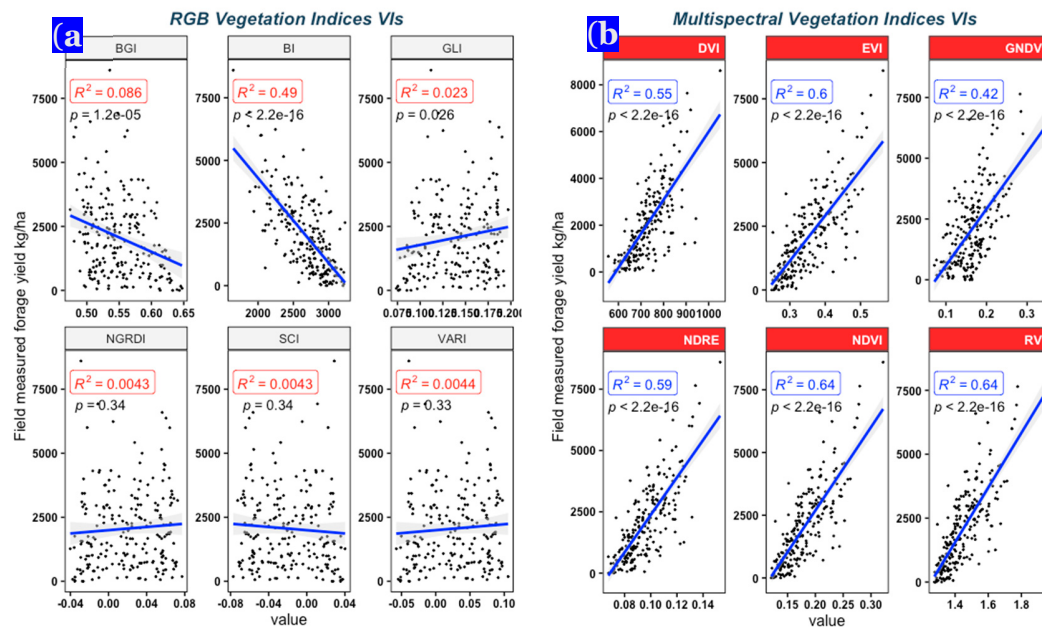

**Figure S8.** Linear relationships and coefficients of determination between the response variable forage yield and: (a) RGB VI, (b) Multispectral red edge and NIR VIs.
